# Supplementary material for: Zucchini-dependent piRNA processing is triggered by recruitment to the cytoplasmic processing machinery
Source: PubMed Central journal article supplement — Genes Dev. 2017 Sep 15;31(18):1858–69. doi: 10.1101/gad.303214.117 (PMC5695087; doi:10.1101/gad.303214.117), 2017-09-15
Supplement: supp_gad.303214.117_Supplemental_Figure_S1.pdf [file supp_gad.303214.117_Supplemental_Figure_S1.pdf]

# Rogers et al. Supplementary Figure 1

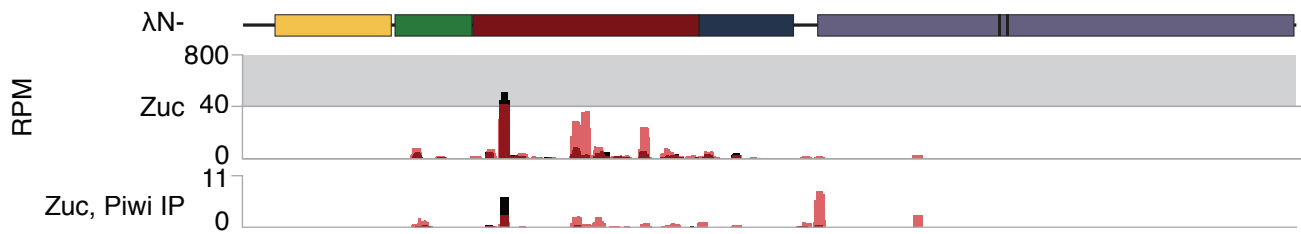

**Supplemental Figure 1. Upon Zuc tethering reporter derived sequences that are 25-28nt in length (black) map along the whole body of the reporter, whereas 22-23nt reads (red) map predominantly at the 5' region of the reporter transcript.** Shown are profiles for reads specifically mapping to the reporter, normalized to all reads mapping to the DM3.
