# Supplementary material for: Zucchini-dependent piRNA processing is triggered by recruitment to the cytoplasmic processing machinery
Source: PubMed Central journal article supplement — Genes Dev. 2017 Sep 15;31(18):1858–69. doi: 10.1101/gad.303214.117 (PMC5695087; doi:10.1101/gad.303214.117), 2017-09-15
Supplement: supp_gad.303214.117_Supplemental_Figure_S2.pdf [file supp_gad.303214.117_Supplemental_Figure_S2.pdf]

## Rogers et al. Supplementary Figure 2

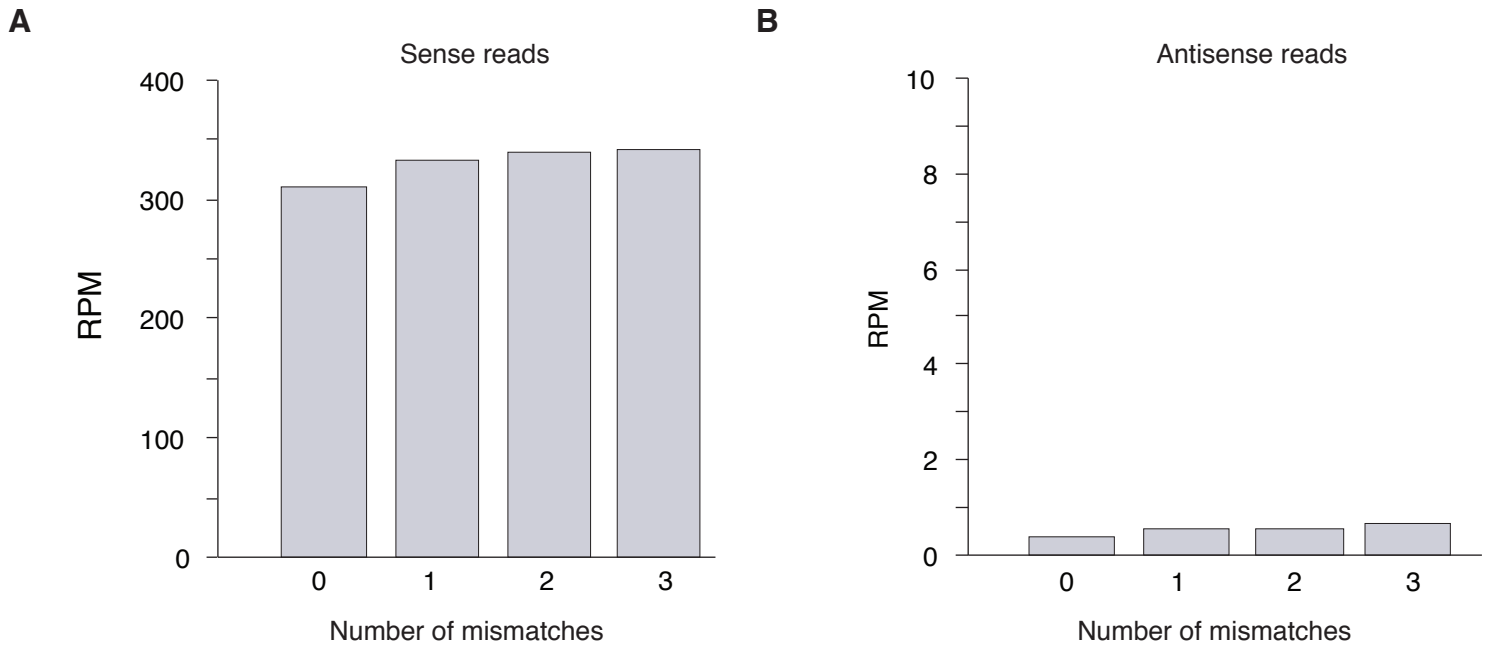

**Supplemental Figure 2. Recruitment of Piwi to the reporter triggers production of piRNAs in sense orientation.**

**A)** Tethering of  $\lambda$ N-Piwi to the reporter results in piRNA-sized (25-28nt) reads in the sense orientation. Shown are RPMs of small RNA from 19-30nt total ovarian RNA calculated for 25-28nt reads mapping to the reporter in sense orientation, allowing 0, 1, 2, or 3 mismatches, normalized to total 25-28nt reads mapping to the DM3 genome. **B)** Tethering of  $\lambda$ N-Piwi to the reporter does not result in piRNA-sized (25-28nt) reads in the antisense orientation. Shown are RPMs of small RNA from 19-30nt total ovarian RNA calculated for 25-28nt reads mapping to the reporter in antisense orientation, allowing 0, 1, 2, or 3 mismatches, normalized to total 25-28nt reads mapping to the DM3 genome.
