# Supplementary material for: Zucchini-dependent piRNA processing is triggered by recruitment to the cytoplasmic processing machinery
Source: PubMed Central journal article supplement — Genes Dev. 2017 Sep 15;31(18):1858–69. doi: 10.1101/gad.303214.117 (PMC5695087; doi:10.1101/gad.303214.117), 2017-09-15
Supplement: supp_gad.303214.117_Supplemental_Figure_S4.pdf [file supp_gad.303214.117_Supplemental_Figure_S4.pdf]

# Rogers et al. Supplementary Figure 4

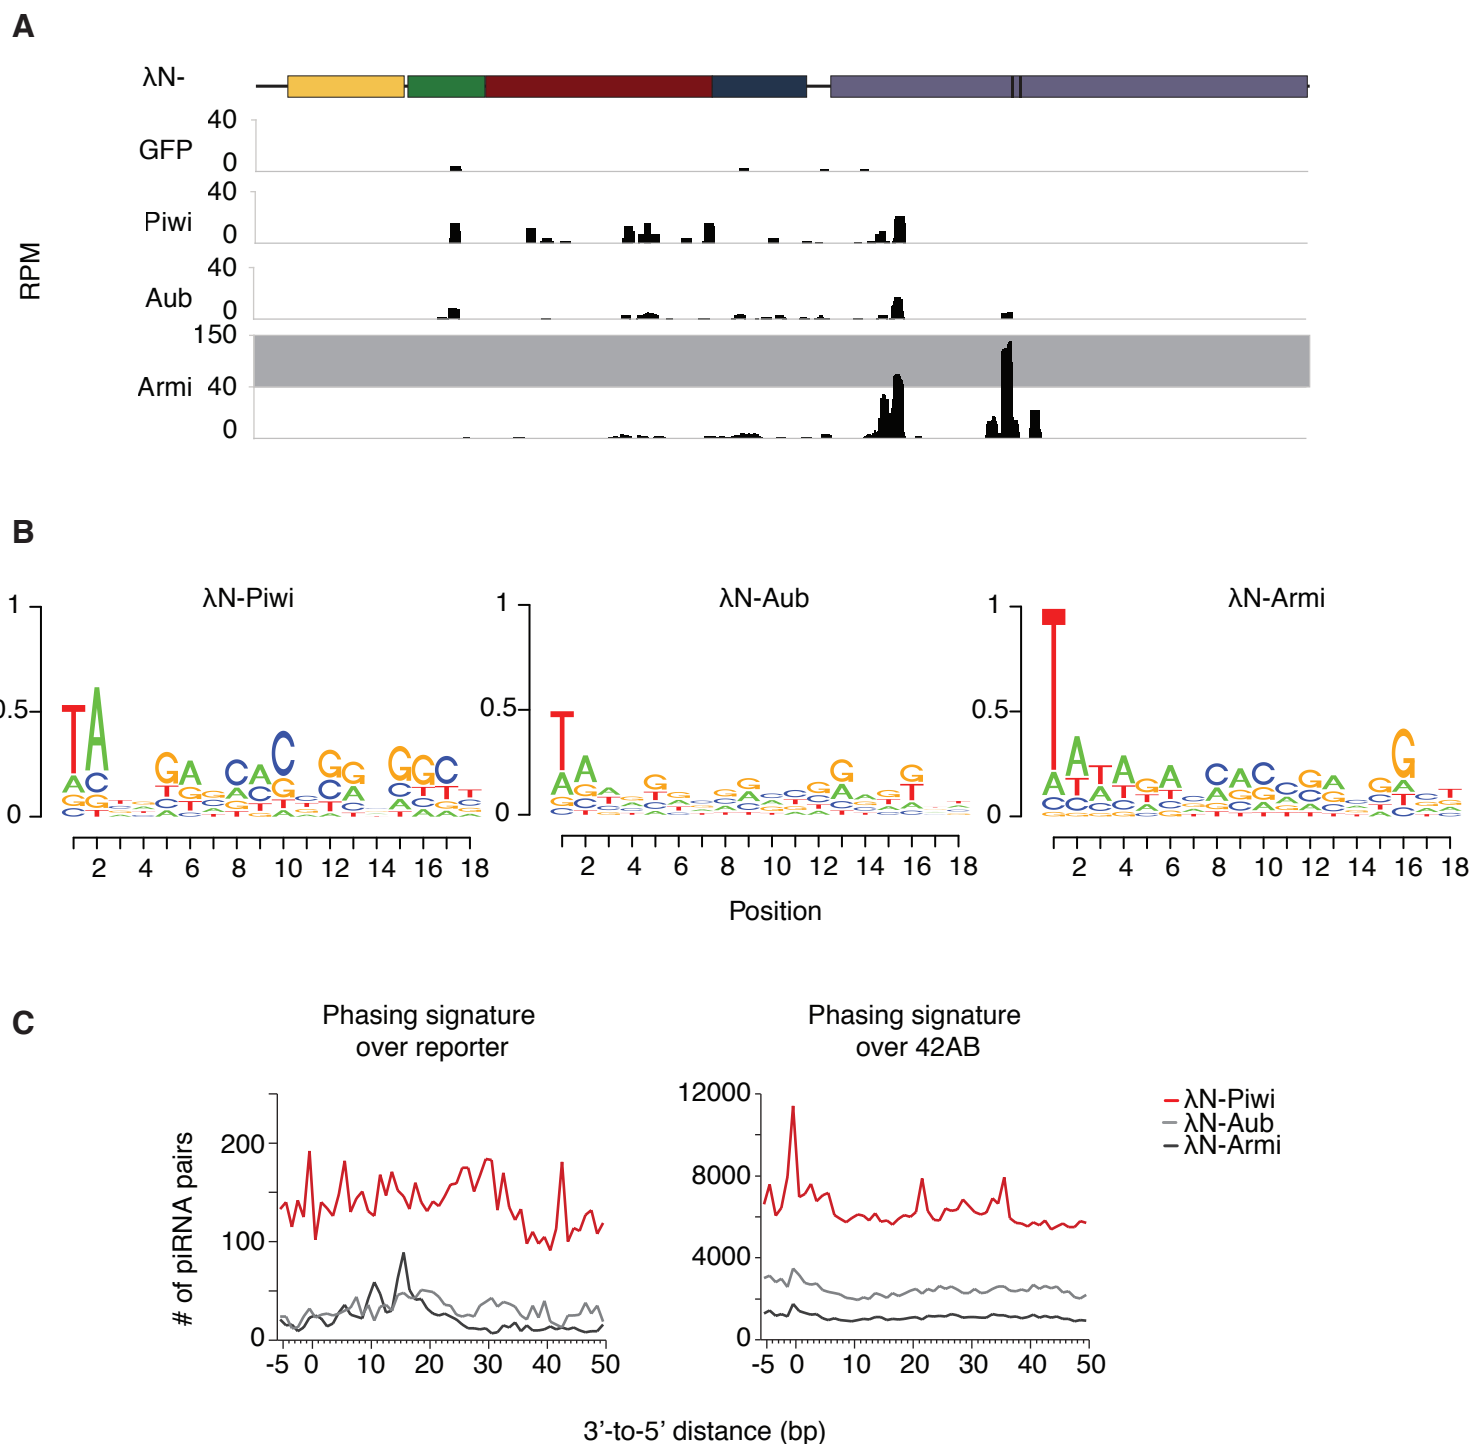

## Supplemental Figure 4. Recruitment of Piwi, Aub, or Armi to the reporter triggers

production of piRNAs resistant to  $\text{NaIO}_4$  treatment. **A)** Shown are profiles for all reads

mapping exclusively to the reporter, normalized to all mapping to the DM3 genome in libraries cloned after  $\text{NaIO}_4$  treatment of RNA. **B)** Reporter-derived small RNAs generated upon Piwi, Aub, or Armi tethering have a 1U bias. Shown are weblogos for all reads mapping exclusively to the reporter in libraries cloned after  $\text{NaIO}_4$  treatment. **C)**

Reporter-derived small RNAs generated upon Piwi, Aub or Armi tethering are not phased. Shown is the calculated 3' to 5' distance between reads mapping to the reporter (left) and reads mapping to 42AB (right).
