# Supplementary material for: Zucchini-dependent piRNA processing is triggered by recruitment to the cytoplasmic processing machinery
Source: PubMed Central journal article supplement — Genes Dev. 2017 Sep 15;31(18):1858–69. doi: 10.1101/gad.303214.117 (PMC5695087; doi:10.1101/gad.303214.117), 2017-09-15
Supplement: supp_gad.303214.117_Supplemental_Figure_S5.pdf [file supp_gad.303214.117_Supplemental_Figure_S5.pdf]

# Rogers et al. Supplementary Figure 5

Percent mRNA remaining after KD, normalized to shW & RP49

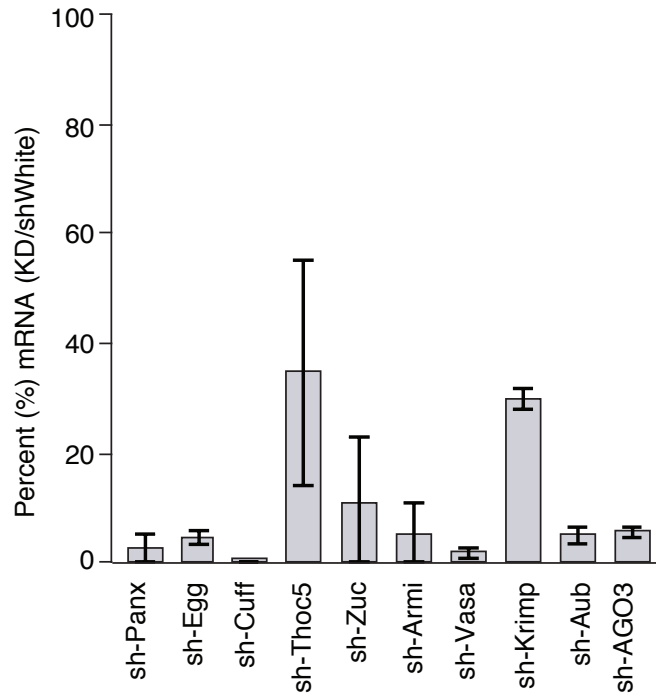

**Supplemental Figure 5. Percent mRNA remaining after knockdown of piRNA pathway component mRNAs in the tethering system.** Knockdown efficiency of each mRNA was measured using RT-QPCR from total ovarian RNA, normalized to RP49 and to RNA levels in the control (shWhite). Error bars indicate standard deviation of biological replicates (n=2).
