# Supplementary material for: Zucchini-dependent piRNA processing is triggered by recruitment to the cytoplasmic processing machinery
Source: PubMed Central journal article supplement — Genes Dev. 2017 Sep 15;31(18):1858–69. doi: 10.1101/gad.303214.117 (PMC5695087; doi:10.1101/gad.303214.117), 2017-09-15
Supplement: supp_gad.303214.117_Supplemental_Table_S1.pdf [file supp_gad.303214.117_Supplemental_Table_S1.pdf]

**Supplemental Table 1. Library mapping statistics.**

| Mapping to:                                   | DM3 genome |           | Reporter  |           |                |                    |                 | 42AB           | Rebase            | miRNA        | Endo-siRNA |
|-----------------------------------------------|------------|-----------|-----------|-----------|----------------|--------------------|-----------------|----------------|-------------------|--------------|------------|
|                                               | Sample     | All reads | All reads | 5'U reads | Specific reads | Specific 5'U reads | All sense reads | Specific reads | 5'U 23-29nt reads | Unique reads | All reads  |
| ΔN-GFP (TJ-gal4) replicate 1 %                | 2344077    | 45        | 17        | 34        | 14             | 44                 | 46879           | 957552         | 510848            | 3034         |            |
| ΔN-GFP (TJ-gal4) replicate 2                  | 6333387    | 92        | 41        | 61        | 25             | 84                 | 123904          | 2525139        | 1503061           | 8681         |            |
| ΔN-Yb (TJ-gal4) replicate 1 %                 | 4849740    | 1797      | 1477      | 1130      | 960            | 1795               | 120766          | 1965418        | 1446366           | 7145         |            |
| ΔN-Yb (TJ-gal4) replicate 2                   | 9291798    | 1195      | 907       | 664       | 506            | 1188               | 244535          | 3456252        | 3060715           | 14563        |            |
| ΔN-Piwi (TJ-gal4) replicate 1 %               | 6371453    | 1031      | 641       | 806       | 486            | 997                | 136398          | 2404211        | 1511076           | 4554         |            |
| ΔN-Piwi (TJ-gal4) replicate 2                 | 8359291    | 900       | 213       | 605       | 146            | 298                | 188777          | 3322242        | 2363988           | 12010        |            |
| ΔN-GFP (MT-gal4) replicate 1 %                | 12046162   | 129       | 74        | 66        | 30             | 115                | 378358          | 4452673        | 3129830           | 11894        |            |
| ΔN-GFP (MT-gal4) replicate 2                  | 5956459    | 50        | 32        | 27        | 17             | 48                 | 189674          | 2522173        | 1586086           | 6601         |            |
| ΔN-Cuff (MT-gal4) replicate 1 %               | 11050911   | 143       | 74        | 87        | 40             | 132                | 247942          | 4679320        | 3736766           | 14756        |            |
| ΔN-Cuff (MT-gal4) replicate 2                 | 101027     | 4         | 0         | 4         | 0              | 3                  | 2433            | 37282          | 8189              | 14           |            |
| ΔN-THOC5 (MT-gal4) replicate 1 %              | 2848142    | 126       | 63        | 86        | 38             | 122                | 35499           | 1345862        | 686334            | 4473         |            |
| ΔN-THOC5 (MT-gal4) replicate 2                | 13246      | 1         | 0         | 1         | 0              | 1                  | 171             | 3733           | 6134              | 27           |            |
| ΔN-Zuc (MT-gal4) replicate 1 %                | 7021497    | 6288      | 931       | 6231      | 910            | 6282               | 100692          | 2075995        | 2998093           | 18089        |            |
| ΔN-Zuc (MT-gal4) replicate 2                  | 6672189    | 8458      | 1099      | 8394      | 1084           | 8450               | 101182          | 2164831        | 2441202           | 13050        |            |
| ΔN-Piwi (MT-gal4) replicate 1 %               | 14003310   | 2820      | 1732      | 1916      | 1044           | 2808               | 302992          | 5291372        | 3104376           | 8390         |            |
| ΔN-Piwi (MT-gal4) replicate 2                 | 10501272   | 854       | 502       | 662       | 378            | 849                | 172803          | 3851723        | 4056208           | 18948        |            |
| ΔN-Arx (MT-gal4) replicate 1 %                | 4977488    | 60        | 38        | 46        | 32             | 52                 | 159264          | 1866641        | 1313932           | 4254         |            |
| ΔN-Arx (MT-gal4) replicate 2                  | 1720575    | 25        | 18        | 13        | 10             | 22                 | 40744           | 571814         | 558210            | 3576         |            |
| ΔN-Egg (MT-gal4) replicate 1 %                | 11654274   | 587       | 159       | 487       | 126            | 573                | 238818          | 3195948        | 4731174           | 25383        |            |
| ΔN-Egg (MT-gal4) replicate 2                  | 6326648    | 490       | 162       | 264       | 77             | 422                | 137834          | 1939413        | 1980572           | 12613        |            |
| ΔN-Panx (MT-gal4) replicate 1 %               | 6407104    | 100       | 64        | 69        | 46             | 94                 | 187024          | 2479665        | 1894213           | 8683         |            |
| ΔN-Panx (MT-gal4) replicate 2                 | 2302003    | 104       | 42        | 70        | 28             | 99                 | 45065           | 638213         | 845587            | 4952         |            |
| ΔN-Aub (MT-gal4) replicate 1 %                | 5898318    | 674       | 377       | 599       | 337            | 670                | 150375          | 2146550        | 1634008           | 5480         |            |
| ΔN-Aub (MT-gal4) replicate 2                  | 6461928    | 811       | 437       | 809       | 436            | 803                | 174663          | 2535271        | 1623796           | 8451         |            |
| ΔN-Armi (MT-gal4) replicate 1 %               | 3824887    | 2145      | 1768      | 1465      | 1261           | 2143               | 87874           | 1297263        | 1223310           | 4634         |            |
| ΔN-Armi (MT-gal4) replicate 2                 | 9266056    | 5320      | 3957      | 3469      | 2699           | 5310               | 240435          | 3642518        | 2989403           | 8157         |            |
| ΔN-Piwi GFP-Piwi IP replicate 1 %             | 18781682   | 7948      | 4391      | 5868      | 2976           | 7915               | 698560          | 8786907        | 1348207           | 2960         |            |
| ΔN-Piwi GFP-Piwi IP replicate 2               | 7791490    | 5688      | 2838      | 1163      | 1459           | 5677               | 220880          | 3619280        | 211387            | 527          |            |
| ΔN-Aub Piwi IP replicate 1 %                  | 9028977    | 2048      | 856       | 1720      | 646            | 2037               | 25954           | 4759656        | 134642            | 599          |            |
| ΔN-Aub Piwi IP replicate 2                    | 7151788    | 1537      | 873       | 1103      | 541            | 1531               | 213405          | 3360445        | 384500            | 1084         |            |
| ΔN-Zuc GFP-Piwi IP replicate 1 %              | 8943934    | 555       | 232       | 4871      | 142            | 552                | 313258          | 5202163        | 266054            | 721          |            |
| ΔN-Zuc GFP-Piwi IP replicate 2                | 5197468    | 483       | 186       | 404       | 116            | 480                | 117748          | 2211612        | 1017994           | 2166         |            |
| ΔN-Piwi sh-White replicate 1 %                | 9138738    | 2326      | 1439      | 1995      | 1220           | 2313               | 227634          | 4008593        | 2067270           | 7110         |            |
| ΔN-Piwi sh-White replicate 2                  | 5781800    | 2284      | 1457      | 1904      | 1196           | 2276               | 135017          | 2448831        | 1223758           | 4072         |            |
| ΔN-Piwi sh-Panx replicate 1 %                 | 6321423    | 2190      | 1317      | 1821      | 1069           | 2183               | 230065          | 2577153        | 1654769           | 5076         |            |
| ΔN-Piwi sh-Panx replicate 2                   | 1128098    | 436       | 284       | 366       | 239            | 433                | 40054           | 428881         | 262232            | 740          |            |
| ΔN-Piwi sh-Egg replicate 1 %                  | 9978444    | 1799      | 1074      | 1443      | 815            | 1787               | 235554          | 3639827        | 3237148           | 11168        |            |
| ΔN-Piwi sh-Egg replicate 2 %                  | 5861571    | 1345      | 837       | 1137      | 682            | 1332               | 117890          | 1725870        | 1866563           | 9216         |            |
| ΔN-Piwi sh-Cuff replicate 1 %                 | 7348197    | 4298      | 2764      | 3637      | 2280           | 4287               | 35247           | 1816550        | 2841750           | 9819         |            |
| ΔN-Piwi sh-Cuff replicate 2                   | 4926517    | 3207      | 2253      | 2561      | 1753           | 3184               | 19695           | 1056932        | 2047340           | 6096         |            |
| ΔN-Piwi sh-THOC5 replicate 1 %                | 3973885    | 1304      | 765       | 1134      | 645            | 1304               | 88488           | 1619213        | 1104102           | 3141         |            |
| ΔN-Piwi sh-THOC5 replicate 2                  | 3600626    | 1311      | 789       | 1067      | 615            | 1311               | 76982           | 1310241        | 1019678           | 3451         |            |
| ΔN-Piwi sh-Zuc replicate 1 %                  | 2087785    | 76        | 13        | 64        | 12             | 73                 | 19094           | 399880         | 821114            | 5028         |            |
| ΔN-Piwi sh-Zuc replicate 2                    | 514916     | 40        | 12        | 27        | 9              | 34                 | 4863            | 105125         | 179913            | 1600         |            |
| ΔN-Piwi sh-Armi replicate 1 %                 | 4245306    | 82        | 23        | 66        | 15             | 80                 | 27284           | 756263         | 2395362           | 9589         |            |
| ΔN-Piwi sh-Armi replicate 2                   | 4389133    | 121       | 40        | 94        | 34             | 112                | 29821           | 790865         | 2457437           | 12015        |            |
| ΔN-Piwi sh-Vasa replicate 1 %                 | 7560513    | 867       | 506       | 697       | 393            | 861                | 76396           | 1813136        | 4011742           | 18746        |            |
| ΔN-Piwi sh-Vasa replicate 2                   | 2594545    | 407       | 205       | 339       | 159            | 401                | 20695           | 438649         | 1257932           | 8632         |            |
| ΔN-Piwi sh-Krimper replicate 1 %              | 10530300   | 1273      | 829       | 955       | 592            | 1227               | 166110          | 3080713        | 4466063           | 23662        |            |
| ΔN-Piwi sh-Krimper replicate 2                | 1368207    | 132       | 76        | 92        | 53             | 125                | 13462           | 251310         | 564699            | 4629         |            |
| ΔN-Piwi sh-Aub replicate 1 %                  | 374891     | 106       | 70        | 87        | 59             | 104                | 3207            | 69579          | 185468            | 771          |            |
| ΔN-Piwi sh-Aub replicate 2                    | 6348155    | 1674      | 1046      | 1331      | 812            | 1670               | 66845           | 1334711        | 3043905           | 15943        |            |
| ΔN-Piwi sh-AGO3 replicate 1 %                 | 3759996    | 2755      | 1743      | 2337      | 1410           | 2750               | 58243           | 1036373        | 1317907           | 3494         |            |
| ΔN-Piwi sh-AGO3 replicate 2                   | 3830634    | 2240      | 1333      | 1837      | 1057           | 2225               | 47351           | 874200         | 1568077           | 6265         |            |
| ΔN-GFP (MT-gal4) NaIO4 treated replicate 1 %  | 1265932    | 30        | 15        | 21        | 10             | 30                 | 47426           | 756081         | 4648              | 720          |            |
| ΔN-GFP (MT-gal4) NaIO4 treated replicate 2    | 1562407    | 104       | 52        | 92        | 42             | 101                | 50061           | 941412         | 5063              | 986          |            |
| ΔN-Zuc (MT-gal4) NaIO4 treated replicate 1 %  | 380848     | 16        | 9         | 14        | 8              | 16                 | 10154           | 239434         | 1825              | 494          |            |
| ΔN-Zuc (MT-gal4) NaIO4 treated replicate 2    | 67210      | 6         | 3         | 6         | 3              | 6                  | 1658            | 39726          | 1354              | 72           |            |
| ΔN-Piwi (MT-gal4) NaIO4 treated replicate 1 % | 283137     | 52        | 33        | 36        | 24             | 50                 | 6702            | 171507         | 641               | 126          |            |
| ΔN-Piwi (MT-gal4) NaIO4 treated replicate 2   | 443150     | 68        | 37        | 58        | 28             | 68                 | 10785           | 254763         | 2534              | 167          |            |
| ΔN-Aub (MT-gal4) NaIO4 treated replicate 1 %  | 3980774    | 381       | 230       | 263       | 155            | 378                | 135912          | 2293238        | 6477              | 1879         |            |
| ΔN-Aub (MT-gal4) NaIO4 treated replicate 2    | 175259     | 14        | 8         | 14        | 8              | 14                 | 5824            | 85906          | 746               | 116          |            |
| ΔN-Armi (MT-gal4) NaIO4 treated replicate 1   | 48081      | 7         | 2         | 3         | 2              | 7                  | 1512            | 16912          | 517               | 32           |            |
| ΔN-Armi (MT-gal4) NaIO4 treated replicate 2 % | 1706046    | 1817      | 1461      | 550       | 438            | 1812               | 51069           | 1039851        | 12395             | 2031         |            |
| ΔN-GFP-Piwi with GFP reporter %               | 8963238    | 509       | 250       | 505       | 199            | 482                | 157730          | 3181335        | 3083185           | 17602        |            |
| ΔN-GFP with GFP reporter %                    | 4582258    | 50        | 27        | 22        | 17             | 30                 | 11071           | 1948988        | 1100320           | 6146         |            |
| ΔN-FLAG-Piwi with GFP reporter %              | 7203731    | 501       | 253       | 420       | 217            | 474                | 112806          | 2143920        | 3265805           | 16256        |            |
| ΔN-FLAG with GFP reporter %                   | 12885683   | 321       | 122       | 140       | 58             | 300                | 320330          | 4566240        | 4531623           | 24346        |            |
| ΔN-FLAG-Piwi with mKate2 reporter %           | 9840772    | 1881      | 1345      | 1584      | 1126           | 1874               | 253903          | 4457571        | 1814397           | 8643         |            |
| ΔN-FLAG with mKate2 reporter %                | 4126774    | 67        | 35        | 50        | 28             | 63                 | 121205          | 1673304        | 1028499           | 3430         |            |

% Indicates which replicate is plotted on tracks
