# Supplementary material for: Zucchini-dependent piRNA processing is triggered by recruitment to the cytoplasmic processing machinery
Source: PubMed Central journal article supplement — Genes Dev. 2017 Sep 15;31(18):1858–69. doi: 10.1101/gad.303214.117 (PMC5695087; doi:10.1101/gad.303214.117), 2017-09-15
Supplement: supp_gad.303214.117_Supplemental_Table_S2.pdf [file supp_gad.303214.117_Supplemental_Table_S2.pdf]

**Supplemental Table 2. Oligonucleotide sequences used in experimental procedures**

| Oligonucleotide name   | Sequence                                                             |
|------------------------|----------------------------------------------------------------------|
| DM_Thoc5_shRNA-F       | CTAGCAGTGGTGAAGCACAAAGATCAAATAGTTATATTCAAGCATATTTGATCTTGTGCTTCACCGCG |
| DM_Thoc5_shRNA-R       | AATTCGCGGTGAAGCACAAAGATCAAATATGCTTGAATATAACTATTTGATCTTGTGCTTCACCACTG |
| RP49-F                 | CCGCTTCAAGGGACAGTATCT                                                |
| RP49-R                 | ATCTCGCCGCAGTAAACG                                                   |
| Panoramix-F            | GACGAGGGCGCAGATGATAA                                                 |
| Panoramix-R            | TCATTCTGCGAACTGGCACT                                                 |
| Egg-F                  | ATGGAGGTAAGGCCCTGAT                                                  |
| Egg-R                  | TGGCTTTCGTGTTCTCTCCC                                                 |
| Cutoff-F               | CTGAAGAGGGCCATGCAAGA                                                 |
| Cutoff-R               | GCTGGTGCATCTTAATGCCG                                                 |
| Thoc5-F                | TGAGCTCCAAGCAGGAACTG                                                 |
| Thoc5-R                | TGCGCTTAGCTTCCATTCCA                                                 |
| Zucchini-F             | ATTGTTTCGCTGCGGAATGTG                                                |
| Zucchini-R             | TGATCCGGATAATCACGCCG                                                 |
| Armi-F                 | CGTGTGCAAAACCAAGGAGG                                                 |
| Armi-R                 | AGCAACAAATCTGCGCTTGG                                                 |
| Vasa-F                 | TGTAGTGATGTTCTGGACGC                                                 |
| Vasa-R                 | AATGTCTGATGTTCTGGACGC                                                |
| Krimper-F              | CTGGCTGCAAAACAGGGAAC                                                 |
| Krimper-R              | TCCCTTGGGAGGCAATAGGA                                                 |
| Aub-F                  | TCCGCTACTTCTCCACCGTA                                                 |
| Aub-R                  | TCACCTCGCTGTTTACCACC                                                 |
| AGO3-F                 | AGGAATGGCAAACCTCCCCAC                                                |
| AGO3-R                 | CCCGAGAAGATGCGAGTGTT                                                 |
| FISH Probes for mKate2 | TGTTCTCCTTAATCAGCTCG                                                 |
|                        | TCCATGTACAGCTTCATGTG                                                 |
|                        | TCGGATGTGCACCTGAAGTG                                                 |
|                        | CTTGATTCTCATGGTCTGGG                                                 |
|                        | GTCGAAGGCGAAGGGGAGAG                                                 |
|                        | TACATGAAGCTGGTAGCCAG                                                 |
|                        | GTTGATGAAGGTTTTGCTGC                                                 |
|                        | TCGGGGAAGGACTGCTTAAA                                                 |
|                        | TTCGTATGTGGTGACTCTCT                                                 |
|                        | CTTGACGTTGTAGATGAGGC                                                 |
|                        | CGTTGGATGGGAAGTTCACC                                                 |
|                        | AGTGTTCCTTCTGCATCAC                                                  |
|                        | TCAAGTTGCAGATCAGGTGG                                                 |
|                        | TTCTTGGATCTGTATGTGGT                                                 |
|                        | CATCTTGAGGTTCTTAGCGG                                                 |
|                        | TGTCCACATAGTAGACGCCG                                                 |
|                        | CTCCTTGATTCTTCCAGTC                                                  |
|                        | TCGACGTAGGTCTCTTTGTC                                                 |
|                        | TAGGGAGGTCGCAGTATCTG                                                 |
|                        | AACAAAGGAACCAGATCCCT                                                 |
|                        | AAAGGAACCTTTGGTTCGAGC                                                |
|                        | CAATTTGGCCCTTTTTCAGG                                                 |
|                        | TGCATGAATATCCTCCAGTG                                                 |
|                        | CCACAAAGGAACCTTTGGTC                                                 |
|                        | ATCAATTTGGCCCTTTTCA                                                  |
|                        | TCGAGTGCATGAATATCCTC                                                 |
|                        | CGTTACGTTAACGTTAACGT                                                 |
|                        | ATGTTATCAAGCTCCTCGAG                                                 |
|                        | TACTCTTGACCATGGGTTTA                                                 |
|                        | GTGTTCTCAACTTCAAAGGC                                                 |
|                        | AATGTCAGGTTTAAACCAGGG                                                |
|                        | GCTTTTAACTGAGTTTCTTC                                                 |
|                        | ATTGCTAATTGCTAATTGCT                                                 |
|                        | CTTCTCGTTTTGAAGTCAGC                                                 |
|                        | GTGCCTTACAAATACTTGCA                                                 |
|                        | AGCCGTCGGTGGTCTATAAA                                                 |
|                        | AGTTACATGACGAGCCCTAA                                                 |
|                        | ATGTTCAATTGGGTTTACC                                                  |
|                        | ATCTTCCCCATTGATAATAA                                                 |
|                        | ATTACTTTGCTACCTGAGGG                                                 |
|                        | CTTAGGACTCTCTATTTGCA                                                 |
|                        | AAGGTCAAAGGGCCAGATTT                                                 |
|                        | ATTGAACCCAAATGCACCTG                                                 |
|                        | GGGATGGGAAAGTGTATTAT                                                 |
|                        | TGCGGTATTCTTCATTATTG                                                 |
